# Supplementary material for: Angiogenesis related gene expression significantly associated with the prognostic role of an urothelial bladder carcinoma
Source: PubMed Central journal article supplement — Transl Androl Urol. 2020 Oct;9(5):2200–10. doi: 10.21037/tau-20-1291 (PMC7658114; doi:10.21037/tau-20-1291), 2020-10
Supplement: tau-09-05-2200-supplementary.pdf [file tau-09-05-2200-supplementary.pdf]

| <b>Enrolled angiogenesis related genes</b> |                                                                    |                                                                                                                                                                                                                                                                                                                                                                                                                                                                                                                                                                                           |
|--------------------------------------------|--------------------------------------------------------------------|-------------------------------------------------------------------------------------------------------------------------------------------------------------------------------------------------------------------------------------------------------------------------------------------------------------------------------------------------------------------------------------------------------------------------------------------------------------------------------------------------------------------------------------------------------------------------------------------|
| <b>ID</b>                                  | <b>Gene name</b>                                                   | <b>UP_KEYWORDS</b>                                                                                                                                                                                                                                                                                                                                                                                                                                                                                                                                                                        |
| <b>ADAM15</b>                              | <b>ADAM metalloproteinase domain 15 (ADAM15)</b>                   | <b>Alternative splicing, Angiogenesis, Cell adhesion, Cell junction, Cell projection, Cleavage on pair of basic residues, Collagen degradation, Complete proteome, Cytoplasmic vesicle, Disulfide bond, EGF-like domain, Glycoprotein, Hydrolase, Membrane, Metal-binding, Metalloprotease, Phosphoprotein, Polymorphism, Protease, Reference proteome, SH3-binding, Signal, Transmembrane, Transmembrane helix, Zinc, Zymogen</b>                                                                                                                                                        |
| <b>AKT1</b>                                | <b>AKT serine/threonine kinase 1 (AKT1)</b>                        | <b>3D-structure, Acetylation, Alternative splicing, Apoptosis, ATP-binding, Carbohydrate metabolism, Cell membrane, Complete proteome, Cytoplasm, Developmental protein, Disease mutation, Disulfide bond, Glucose metabolism, Glycogen biosynthesis, Glycogen metabolism, Glycoprotein, Isopeptide bond, Kinase, Membrane, Neurogenesis, Nucleotide-binding, Nucleus, Phosphoprotein, Polymorphism, Proteomics identification, Proto-oncogene, Reference proteome, Serine/threonine-protein kinase, Sugar transport, Transferase, Translation regulation, Transport, Ubl conjugation</b> |
| <b>BCAS3</b>                               | <b>BCAS3, microtubule associated cell migration factor (BCAS3)</b> | <b>Acetylation, Alternative splicing, Angiogenesis, Chromosomal rearrangement, Complete proteome, Cytoplasm, Cytoskeleton, Isopeptide bond, Nucleus, Phosphoprotein, Polymorphism, Proteomics identification, Proto-oncogene, Reference proteome, Repeat, Transcription, Transcription regulation, Ubl conjugation, WD repeat</b>                                                                                                                                                                                                                                                         |
| <b>CXCL17</b>                              | <b>C-X-C motif chemokine ligand 17</b>                             | <b>Angiogenesis, Chemotaxis, Complete proteome, Developmental protein, Differentiation, Direct protein sequencing, Disulfide bond, Proteomics identification, Reference proteome, Secreted, Signal</b>                                                                                                                                                                                                                                                                                                                                                                                    |

|               |                                                 |                                                                                                                                                                                                                                                                                                                                                                                                                                            |
|---------------|-------------------------------------------------|--------------------------------------------------------------------------------------------------------------------------------------------------------------------------------------------------------------------------------------------------------------------------------------------------------------------------------------------------------------------------------------------------------------------------------------------|
|               | <b>(CXCL17)</b>                                 |                                                                                                                                                                                                                                                                                                                                                                                                                                            |
| <b>CXCR3</b>  | <b>C-X-C motif chemokine receptor 3 (CXCR3)</b> | <b>Alternative splicing, Angiogenesis, Apoptosis, Cell membrane, Chemotaxis, Complete proteome, Disulfide bond, G-protein coupled receptor, Glycoprotein, Membrane, Polymorphism, Receptor, Reference proteome, Sulfation, Transducer, Transmembrane, Transmembrane helix</b>                                                                                                                                                              |
| <b>CD160</b>  | <b>CD160 molecule (CD160)</b>                   | <b>Cell membrane, Complete proteome, Disulfide bond, Glycoprotein, GPI-anchor, Immunoglobulin domain, Lipoprotein, Membrane, Polymorphism, Proteomics identification, Receptor, Reference proteome, Signal, Transmembrane</b>                                                                                                                                                                                                              |
| <b>CD34</b>   | <b>CD34 molecule (CD34)</b>                     | <b>Alternative splicing, Cell adhesion, Complete proteome, Direct protein sequencing, Glycoprotein, Membrane, Phosphoprotein, Polymorphism, Proteomics identification, Reference proteome, Signal, Transmembrane, Transmembrane helix</b>                                                                                                                                                                                                  |
| <b>DAB2IP</b> | <b>DAB2 interacting protein (DAB2IP)</b>        | <b>Alternative splicing, Angiogenesis, Apoptosis, Cell cycle, Cell membrane, Cell projection, Chromosomal rearrangement, Coiled coil, Complete proteome, Cytoplasm, Developmental protein, Growth regulation, GTPase activation, Immunity, Inflammatory response, Innate immunity, Membrane, Phosphoprotein, Polymorphism, Proteomics identification, Reference proteome, Stress response, Tumor suppressor, Unfolded protein response</b> |
| <b>EGFL7</b>  | <b>EGF like domain multiple 7 (EGFL7)</b>       | <b>Angiogenesis, Calcium, Cell adhesion, Coiled coil, Complete proteome, Developmental protein, Differentiation, Disulfide bond, EGF-like domain, Polymorphism, Proteomics identification, Reference proteome, Repeat, Secreted, Signal</b>                                                                                                                                                                                                |
| <b>EPHA1</b>  | <b>EPH receptor A1</b>                          | <b>3D-structure, Alternative splicing, Angiogenesis, ATP-binding, Cell adhesion, Cell membrane,</b>                                                                                                                                                                                                                                                                                                                                        |

|                |                                                                                                                                                                             |                                                                                                                                                                                                                                                                                                                                                                                                                                                                                  |
|----------------|-----------------------------------------------------------------------------------------------------------------------------------------------------------------------------|----------------------------------------------------------------------------------------------------------------------------------------------------------------------------------------------------------------------------------------------------------------------------------------------------------------------------------------------------------------------------------------------------------------------------------------------------------------------------------|
|                | <b>(EPHA1)</b>                                                                                                                                                              | <b>Complete proteome, Glycoprotein, Kinase, Membrane, Nucleotide-binding, Phosphoprotein, Polymorphism, Receptor, Reference proteome, Repeat, Signal, Transferase, Transmembrane, Transmembrane helix, Tyrosine-protein kinase, Ubl conjugation</b>                                                                                                                                                                                                                              |
| <b>EPHA2</b>   | <b>EPH receptor A2<br/>(EPHA2)</b>                                                                                                                                          | <b>3D-structure, Alternative splicing, Angiogenesis, Apoptosis, ATP-binding, Cataract, Cell adhesion, Cell junction, Cell membrane, Cell projection, Complete proteome, Differentiation, Disease mutation, Disulfide bond, Glycoprotein, Host-virus interaction, Kinase, Membrane, Nucleotide-binding, Phosphoprotein, Polymorphism, Receptor, Reference proteome, Repeat, Signal, Transferase, Transmembrane, Transmembrane helix, Tyrosine-protein kinase, Ubl conjugation</b> |
| <b>EPHB3</b>   | <b>EPH receptor B3<br/>(EPHB3)</b>                                                                                                                                          | <b>3D-structure, Angiogenesis, ATP-binding, Cell membrane, Cell projection, Complete proteome, Developmental protein, Disulfide bond, Glycoprotein, Kinase, Membrane, Neurogenesis, Nucleotide-binding, Phosphoprotein, Polymorphism, Receptor, Reference proteome, Repeat, Signal, Transferase, Transmembrane, Transmembrane helix, Tyrosine-protein kinase</b>                                                                                                                 |
| <b>EPHB4</b>   | <b>EPH receptor B4<br/>(EPHB4)</b>                                                                                                                                          | <b>3D-structure, Alternative splicing, Angiogenesis, ATP-binding, Cell membrane, Complete proteome, Developmental protein, Disulfide bond, Glycoprotein, Kinase, Membrane, Nucleotide-binding, Phosphoprotein, Polymorphism, Proteomics identification, Receptor, Reference proteome, Repeat, Signal, Transferase, Transmembrane, Transmembrane helix, Tyrosine-protein kinase</b>                                                                                               |
| <b>EMC10</b>   | <b>Alternative splicing, Complete proteome, Glycoprotein, Membrane, Proteomics identification, Reference proteome, Secreted, Signal, Transmembrane, Transmembrane helix</b> |                                                                                                                                                                                                                                                                                                                                                                                                                                                                                  |
| <b>HTATIP2</b> | <b>HIV-1 Tat</b>                                                                                                                                                            | <b>3D-structure, Acetylation, Alternative splicing, Angiogenesis, Apoptosis, Complete proteome,</b>                                                                                                                                                                                                                                                                                                                                                                              |

|               |                                                                       |                                                                                                                                                                                                                                                                                                         |
|---------------|-----------------------------------------------------------------------|---------------------------------------------------------------------------------------------------------------------------------------------------------------------------------------------------------------------------------------------------------------------------------------------------------|
|               | <b>interactive protein 2 (HTATIP2)</b>                                | <b>Cytoplasm, Developmental protein, Differentiation, Host-virus interaction, NADP, Nucleus, Oxidoreductase, Polymorphism, Proteomics identification, Reference proteome, Tumor suppressor</b>                                                                                                          |
| <b>KRIT1</b>  | <b>KRIT1, ankyrin repeat containing (KRIT1)</b>                       | <b>3D-structure, Alternative splicing, Angiogenesis, ANK repeat, Cell junction, Cell membrane, Complete proteome, Cytoplasm, Cytoskeleton, Disease mutation, Membrane, Proteomics identification, Reference proteome, Repeat</b>                                                                        |
| <b>NAA15</b>  | <b>N (alpha)-acetyltransferase 15, NatA auxiliary subunit (NAA15)</b> | <b>Acetylation, Alternative splicing, Angiogenesis, Coiled coil, Complete proteome, Cytoplasm, Developmental protein, Differentiation, Nucleus, Phosphoprotein, Proteomics identification, Reference proteome, Repeat, TPR repeat, Transcription, Transcription regulation</b>                          |
| <b>NOX5</b>   | <b>NADPH oxidase 5 (NOX5)</b>                                         | <b>Alternative splicing, Angiogenesis, Calcium, Complete proteome, Electron transport, Endoplasmic reticulum, FAD, Flavoprotein, Ion channel, Ion transport, Membrane, Metal-binding, NADP, Oxidoreductase, Polymorphism, Reference proteome, Repeat, Transmembrane, Transmembrane helix, Transport</b> |
| <b>NUS1</b>   | <b>NUS1 dehydrolichyl diphosphate synthase subunit (NUS1)</b>         | <b>Angiogenesis, Complete proteome, Congenital disorder of glycosylation, Developmental protein, Differentiation, Disease mutation, Endoplasmic reticulum, Glycoprotein, Membrane, Polymorphism, Receptor, Reference proteome, Transferase, Transmembrane, Transmembrane helix</b>                      |
| <b>OTULIN</b> | <b>OTU deubiquitinase</b>                                             | <b>3D-structure, Acetylation, Angiogenesis, Complete proteome, Cytoplasm, Disease mutation,</b>                                                                                                                                                                                                         |

|                 |                                                           |                                                                                                                                                                                                                                                                                |
|-----------------|-----------------------------------------------------------|--------------------------------------------------------------------------------------------------------------------------------------------------------------------------------------------------------------------------------------------------------------------------------|
|                 | <b>with linear linkage specificity (OTULIN)</b>           | <b>Hydrolase, Immunity, Innate immunity, Phosphoprotein, Polymorphism, Protease, Proteomics identification, Reference proteome, Thiol protease, Ubl conjugation, Ubl conjugation pathway, Wnt signaling pathway</b>                                                            |
| <b>RAPGEF3</b>  | <b>Rap guanine nucleotide exchange factor 3 (RAPGEF3)</b> | <b>Alternative splicing, Angiogenesis, cAMP, cAMP-binding, Complete proteome, Guanine-nucleotide releasing factor, Membrane, Nucleotide-binding, Phosphoprotein, Polymorphism, Proteomics identification, Reference proteome</b>                                               |
| <b>RASIP1</b>   | <b>Ras interacting protein 1 (RASIP1)</b>                 | <b>Angiogenesis, Complete proteome, Cytoplasm, Golgi apparatus, Methylation, Phosphoprotein, Polymorphism, Proteomics identification, Reference proteome</b>                                                                                                                   |
| <b>ARHGAP22</b> | <b>Rho GTPase activating protein 22 (ARHGAP22)</b>        | <b>Alternative splicing, Angiogenesis, Coiled coil, Complete proteome, Cytoplasm, Developmental protein, Differentiation, GTPase activation, Nucleus, Phosphoprotein, Polymorphism, Proteomics identification, Reference proteome, Transcription, Transcription regulation</b> |
| <b>ARHGAP24</b> | <b>Rho GTPase activating protein 24 (ARHGAP24)</b>        | <b>Alternative splicing, Angiogenesis, Cell junction, Cell projection, Coiled coil, Complete proteome, Cytoplasm, Cytoskeleton, Developmental protein, Differentiation, GTPase activation, Phosphoprotein, Proteomics identification, Reference proteome</b>                   |
| <b>SH2D2A</b>   | <b>SH2 domain containing 2A (SH2D2A)</b>                  | <b>Alternative splicing, Angiogenesis, Complete proteome, Cytoplasm, Developmental protein, Differentiation, Phosphoprotein, Polymorphism, Reference proteome, SH2 domain, SH3-binding</b>                                                                                     |
| <b>SHB</b>      | <b>SH2 domain containing adaptor</b>                      | <b>Alternative splicing, Angiogenesis, Apoptosis, Cell membrane, Complete proteome, Cytoplasm, Developmental protein, Differentiation, Membrane, Phosphoprotein, Reference proteome, SH2</b>                                                                                   |

|                  | <b>protein B (SHB)</b>                                 | <b>domain</b>                                                                                                                                                                                                                                                                                                                                                                                                                                                                                                       |
|------------------|--------------------------------------------------------|---------------------------------------------------------------------------------------------------------------------------------------------------------------------------------------------------------------------------------------------------------------------------------------------------------------------------------------------------------------------------------------------------------------------------------------------------------------------------------------------------------------------|
| <b>SHC1</b>      | <b>SHC adaptor protein 1 (SHC1)</b>                    | <b>3D-structure, Acetylation, Alternative promoter usage, Alternative splicing, Angiogenesis, Complete proteome, Cytoplasm, Growth regulation, Host-virus interaction, Mitochondrion, Phosphoprotein, Polymorphism, Proteomics identification, Reference proteome, SH2 domain</b>                                                                                                                                                                                                                                   |
| <b>TEK</b>       | <b>TEK receptor tyrosine kinase (TEK)</b>              | <b>3D-structure, Alternative splicing, Angiogenesis, ATP-binding, Cell junction, Cell membrane, Complete proteome, Cytoplasm, Cytoskeleton, Direct protein sequencing, Disease mutation, Disulfide bond, EGF-like domain, Glycoprotein, Immunoglobulin domain, Kinase, Membrane, Nucleotide-binding, Phosphoprotein, Polymorphism, Proteomics identification, Receptor, Reference proteome, Repeat, Secreted, Signal, Transferase, Transmembrane, Transmembrane helix, Tyrosine-protein kinase, Ubl conjugation</b> |
| <b>TNFAIP2</b>   | <b>TNF alpha induced protein 2 (TNFAIP2)</b>           | <b>Angiogenesis, Complete proteome, Developmental protein, Differentiation, Polymorphism, Proteomics identification, Reference proteome</b>                                                                                                                                                                                                                                                                                                                                                                         |
| <b>TNFRSF12A</b> | <b>TNF receptor superfamily member 12A (TNFRSF12A)</b> | <b>3D-structure, Alternative splicing, Angiogenesis, Apoptosis, Cell adhesion, Complete proteome, Developmental protein, Differentiation, Disulfide bond, Membrane, Proteomics identification, Receptor, Reference proteome, Signal, Transmembrane, Transmembrane helix</b>                                                                                                                                                                                                                                         |
| <b>XBP1</b>      | <b>X-box binding protein 1 (XBP1)</b>                  | <b>Acetylation, Activator, Alternative splicing, Angiogenesis, Apoptosis, Autophagy, Cleavage on pair of basic residues, Coiled coil, Complete proteome, Cytoplasm, Developmental protein, Differentiation, DNA-binding, Endoplasmic reticulum, Lipid biosynthesis, Lipid metabolism, Membrane, Myogenesis, Nucleus, Oncogene, Phosphoprotein, Polymorphism, Protein transport, Proteomics identification,</b>                                                                                                      |

|        |                                                 |                                                                                                                                                                                                                                                                                                                                                                                                                                                                |
|--------|-------------------------------------------------|----------------------------------------------------------------------------------------------------------------------------------------------------------------------------------------------------------------------------------------------------------------------------------------------------------------------------------------------------------------------------------------------------------------------------------------------------------------|
|        |                                                 | Reference proteome, Signal, Signal-anchor, Stress response, Transcription, Transcription regulation, Transmembrane, Transmembrane helix, Transport, Ubl conjugation, Unfolded protein response                                                                                                                                                                                                                                                                 |
| ACVRL1 | activin A receptor like type 1 (ACVRL1)         | 3D-structure, Angiogenesis, ATP-binding, Cell membrane, Complete proteome, Disease mutation, Disulfide bond, Glycoprotein, Kinase, Magnesium, Manganese, Membrane, Metal-binding, Nucleotide-binding, Phosphoprotein, Polymorphism, Proteomics identification, Receptor, Reference proteome, Serine/threonine-protein kinase, Signal, Transferase, Transmembrane, Transmembrane helix                                                                          |
| ADGRA2 | adhesion G protein-coupled receptor A2 (ADGRA2) | Alternative splicing, Angiogenesis, Cell membrane, Cell projection, Complete proteome, Direct protein sequencing, Disulfide bond, G-protein coupled receptor, Glycoprotein, Immunoglobulin domain, Leucine-rich repeat, Membrane, Phosphoprotein, Polymorphism, Proteomics identification, Receptor, Reference proteome, Repeat, Signal, Transducer, Transmembrane, Transmembrane helix                                                                        |
| ANPEP  | alanyl aminopeptidase, membrane (ANPEP)         | 3D-structure, Aminopeptidase, Angiogenesis, Cell membrane, Complete proteome, Cytoplasm, Developmental protein, Differentiation, Direct protein sequencing, Disulfide bond, Glycoprotein, Host cell receptor for virus entry, Host-virus interaction, Hydrolase, Membrane, Metal-binding, Metalloprotease, Polymorphism, Protease, Proteomics identification, Receptor, Reference proteome, Signal-anchor, Sulfation, Transmembrane, Transmembrane helix, Zinc |
| AIMP1  | aminoacyl tRNA synthetase complex interacting   | 3D-structure, Acetylation, Alternative splicing, Angiogenesis, Apoptosis, Carbohydrate metabolism, Cell adhesion, Coiled coil, Complete proteome, Cytokine, Cytoplasm, Cytoplasmic vesicle, Endoplasmic reticulum, Glucose metabolism, Golgi apparatus, Inflammatory response, Isopeptide                                                                                                                                                                      |

|               |                                                                 |                                                                                                                                                                                                                                                                                                                                                                                                                          |
|---------------|-----------------------------------------------------------------|--------------------------------------------------------------------------------------------------------------------------------------------------------------------------------------------------------------------------------------------------------------------------------------------------------------------------------------------------------------------------------------------------------------------------|
|               | <b>multifunctional protein 1 (AIMP1)</b>                        | <b>bond, Leukodystrophy, Nucleus, Phosphoprotein, Polymorphism, Protein biosynthesis, Proteomics identification, Reference proteome, RNA-binding, Secreted, tRNA-binding, Ubl conjugation</b>                                                                                                                                                                                                                            |
| <b>AAMP</b>   | <b>angio associated migratory cell protein (AAMP)</b>           | <b>Angiogenesis, Cell membrane, Complete proteome, Cytoplasm, Developmental protein, Differentiation, Direct protein sequencing, Membrane, Phosphoprotein, Polymorphism, Proteomics identification, Reference proteome, Repeat, WD repeat</b>                                                                                                                                                                            |
| <b>AGGF1</b>  | <b>angiogenic factor with G-patch and FHA domains 1 (AGGF1)</b> | <b>Acetylation, Alternative splicing, Angiogenesis, Coiled coil, Complete proteome, Cytoplasm, Developmental protein, Differentiation, Disease mutation, Phosphoprotein, Polymorphism, Reference proteome, Secreted</b>                                                                                                                                                                                                  |
| <b>ANG</b>    | <b>angiogenin (ANG)</b>                                         | <b>3D-structure, Amyotrophic lateral sclerosis, Angiogenesis, Complete proteome, Cytoplasmic vesicle, Developmental protein, Differentiation, Direct protein sequencing, Disease mutation, Disulfide bond, DNA-binding, Endonuclease, Hydrolase, Neurodegeneration, Nuclease, Nucleus, Polymorphism, Protein synthesis inhibitor, Pyrrolidone carboxylic acid, Reference proteome, Secreted, Signal, Stress response</b> |
| <b>ANGPT1</b> | <b>angiopoietin 1 (ANGPT1)</b>                                  | <b>3D-structure, Alternative splicing, Angiogenesis, Coiled coil, Complete proteome, Developmental protein, Differentiation, Disulfide bond, Glycoprotein, Polymorphism, Proteomics identification, Reference proteome, Secreted, Signal</b>                                                                                                                                                                             |
| <b>ANGPT2</b> | <b>angiopoietin 2 (ANGPT2)</b>                                  | <b>3D-structure, Alternative splicing, Angiogenesis, Calcium, Coiled coil, Complete proteome, Developmental protein, Differentiation, Disulfide bond, Glycoprotein, Metal-binding, Polymorphism,</b>                                                                                                                                                                                                                     |



|                |                                                             |                                                                                                                                                                                                                                                      |
|----------------|-------------------------------------------------------------|------------------------------------------------------------------------------------------------------------------------------------------------------------------------------------------------------------------------------------------------------|
|                |                                                             | <b>Proteomics identification, Reference proteome, Secreted, Signal</b>                                                                                                                                                                               |
| <b>ANGPT4</b>  | <b>angiotensinogen converting enzyme 2 (ANGPT4)</b>         | <b>Alternative splicing, Angiogenesis, Coiled coil, Complete proteome, Disulfide bond, Glycoprotein, Polymorphism, Reference proteome, Secreted, Signal</b>                                                                                          |
| <b>ANGPTL3</b> | <b>angiotensinogen converting enzyme 2 like 3 (ANGPTL3)</b> | <b>Angiogenesis, Cell adhesion, Cell projection, Coiled coil, Complete proteome, Direct protein sequencing, Disulfide bond, Glycoprotein, Heparin-binding, Lipid metabolism, Polymorphism, Reference proteome, Secreted, Signal</b>                  |
| <b>ANGPTL4</b> | <b>angiotensinogen converting enzyme 2 like 4 (ANGPTL4)</b> | <b>Alternative splicing, Angiogenesis, Coiled coil, Complete proteome, Developmental protein, Differentiation, Disulfide bond, Extracellular matrix, Glycoprotein, Polymorphism, Proteomics identification, Reference proteome, Secreted, Signal</b> |
| <b>ANGPTL6</b> | <b>angiotensinogen converting enzyme 2 like 6 (ANGPTL6)</b> | <b>Angiogenesis, Coiled coil, Complete proteome, Developmental protein, Differentiation, Disulfide bond, Glycoprotein, Proteomics identification, Reference proteome, Secreted, Signal</b>                                                           |
| <b>APELA</b>   | <b>apelin receptor early endogenous ligand (APELA)</b>      | <b>Complete proteome, Developmental protein, Gastrulation, Glycoprotein, Hormone, Membrane, Reference proteome, Secreted, Signal, Transmembrane, Transmembrane helix</b>                                                                             |
| <b>APLNR</b>   | <b>apelin receptor (APLNR)</b>                              | <b>3D-structure, Cell membrane, Complete proteome, Developmental protein, G-protein coupled receptor, Gastrulation, Glycoprotein, Membrane, Polymorphism, Receptor, Reference proteome, Transducer, Transmembrane, Transmembrane helix</b>           |
| <b>APLN</b>    | <b>apelin (APLN)</b>                                        | <b>Cleavage on pair of basic residues, Complete proteome, Hormone, Reference proteome, Secreted, Signal</b>                                                                                                                                          |

|               |                                                           |                                                                                                                                                                                                                                                                                                                                                                                     |
|---------------|-----------------------------------------------------------|-------------------------------------------------------------------------------------------------------------------------------------------------------------------------------------------------------------------------------------------------------------------------------------------------------------------------------------------------------------------------------------|
| <b>APOLD1</b> | <b>apolipoprotein L domain containing 1 (APOLD1)</b>      | <b>Alternative splicing, Angiogenesis, Cell membrane, Coiled coil, Complete proteome, Developmental protein, Differentiation, Lipoprotein, Membrane, Reference proteome, Transmembrane, Transmembrane helix</b>                                                                                                                                                                     |
| <b>CEMIP2</b> | <b>Cell surface hyaluronidase</b>                         | <b>Developmental protein, Glycosidase, Hydrolase, Angiogenesis</b>                                                                                                                                                                                                                                                                                                                  |
| <b>CIB1</b>   | <b>calcium and integrin binding 1 (CIB1)</b>              | <b>3D-structure, Alternative splicing, Angiogenesis, Apoptosis, Calcium, Cell adhesion, Cell cycle, Cell division, Cell membrane, Cell projection, Complete proteome, Cytoplasm, Cytoskeleton, Differentiation, Golgi apparatus, Lipoprotein, Magnesium, Membrane, Metal-binding, Myristate, Nucleus, Phosphoprotein, Polymorphism, Reference proteome, Repeat, Spermatogenesis</b> |
| <b>CSPG4</b>  | <b>chondroitin sulfate proteoglycan 4 (CSPG4)</b>         | <b>Angiogenesis, Cell membrane, Cell projection, Complete proteome, Developmental protein, Differentiation, Disulfide bond, Glycoprotein, Membrane, Phosphoprotein, Polymorphism, Proteoglycan, Reference proteome, Repeat, Signal, Tissue remodeling, Transducer, Transmembrane, Transmembrane helix</b>                                                                           |
| <b>CCBE1</b>  | <b>collagen and calcium binding EGF domains 1 (CCBE1)</b> | <b>Alternative splicing, Angiogenesis, Calcium, Collagen, Complete proteome, Developmental protein, Disease mutation, Disulfide bond, EGF-like domain, Glycoprotein, Mental retardation, Polymorphism, Reference proteome, Repeat, Secreted, Signal</b>                                                                                                                             |
| <b>COL4A1</b> | <b>collagen type IV alpha 1 chain (COL4A1)</b>            | <b>3D-structure, Alternative splicing, Angiogenesis, Basement membrane, Collagen, Complete proteome, Direct protein sequencing, Disease mutation, Disulfide bond, Extracellular matrix, Glycoprotein, Hydroxylation, Polymorphism, Proteomics identification, Reference proteome, Repeat, Secreted,</b>                                                                             |

|                |                                                                                                           | <b>Signal</b>                                                                                                                                                                                                                                                                                                |
|----------------|-----------------------------------------------------------------------------------------------------------|--------------------------------------------------------------------------------------------------------------------------------------------------------------------------------------------------------------------------------------------------------------------------------------------------------------|
| <b>COL4A2</b>  | <b>collagen type IV<br/>alpha 2 chain<br/>(COL4A2)</b>                                                    | <b>3D-structure, Angiogenesis, Basement membrane, Collagen, Complete proteome, Direct protein sequencing, Disease mutation, Disulfide bond, Extracellular matrix, Glycoprotein, Hydroxylation, Polymorphism, Proteomics identification, Reference proteome, Repeat, Secreted, Signal</b>                     |
| <b>COL8A1</b>  | <b>collagen type VIII<br/>alpha 1 chain<br/>(COL8A1)</b>                                                  | <b>Angiogenesis, Basement membrane, Cell adhesion, Collagen, Complete proteome, Extracellular matrix, Hydroxylation, Proteomics identification, Reference proteome, Repeat, Secreted, Signal</b>                                                                                                             |
| <b>COL8A2</b>  | <b>collagen type VIII<br/>alpha 2 chain<br/>(COL8A2)</b>                                                  | <b>Angiogenesis, Basement membrane, Cell adhesion, Collagen, Complete proteome, Corneal dystrophy, Disease mutation, Extracellular matrix, Hydroxylation, Polymorphism, Proteomics identification, Reference proteome, Repeat, Secreted, Signal</b>                                                          |
| <b>COL15A1</b> | <b>collagen type XV<br/>alpha 1 chain<br/>(COL15A1)</b>                                                   | <b>3D-structure, Angiogenesis, Cell adhesion, Collagen, Complete proteome, Developmental protein, Differentiation, Direct protein sequencing, Disulfide bond, Extracellular matrix, Glycoprotein, Hydroxylation, Polymorphism, Proteomics identification, Reference proteome, Repeat, Secreted, Signal</b>   |
| <b>C1GALT1</b> | <b>core 1 synthase,<br/>glycoprotein-N-<br/>acetylgalactosamine<br/>3-beta-<br/>galactosyltransferase</b> | <b>Alternative splicing, Angiogenesis, Complete proteome, Developmental protein, Differentiation, Disulfide bond, Glycosyltransferase, Magnesium, Membrane, Metal-binding, Phosphoprotein, Proteomics identification, Reference proteome, Signal-anchor, Transferase, Transmembrane, Transmembrane helix</b> |

|              |                                                                              |                                                                                                                                                                                                                                                                                                                                                  |
|--------------|------------------------------------------------------------------------------|--------------------------------------------------------------------------------------------------------------------------------------------------------------------------------------------------------------------------------------------------------------------------------------------------------------------------------------------------|
|              | <b>1 (C1GALT1)</b>                                                           |                                                                                                                                                                                                                                                                                                                                                  |
| <b>DLL4</b>  | <b>delta like canonical Notch ligand 4 (DLL4)</b>                            | <b>Angiogenesis, Cell membrane, Complete proteome, Developmental protein, Differentiation, Direct protein sequencing, Disease mutation, Disulfide bond, EGF-like domain, Glycoprotein, Membrane, Neurogenesis, Notch signaling pathway, Reference proteome, Repeat, Sensory transduction, Signal, Transmembrane, Transmembrane helix, Vision</b> |
| <b>ENG</b>   | <b>endoglin (ENG)</b>                                                        | <b>Alternative splicing, Angiogenesis, Cell adhesion, Complete proteome, Direct protein sequencing, Disease mutation, Glycoprotein, Membrane, Phosphoprotein, Polymorphism, Proteomics identification, Reference proteome, Signal, Transmembrane, Transmembrane helix</b>                                                                        |
| <b>EPAS1</b> | <b>endothelial PAS domain protein 1 (EPAS1)</b>                              | <b>3D-structure, Activator, Angiogenesis, Complete proteome, Congenital erythrocytosis, Developmental protein, Differentiation, Disease mutation, DNA-binding, Hydroxylation, Nucleus, Phosphoprotein, Polymorphism, Reference proteome, Repeat, Transcription, Transcription regulation, Ubl conjugation</b>                                    |
| <b>ESM1</b>  | <b>endothelial cell specific molecule 1 (ESM1)</b>                           | <b>Alternative splicing, Angiogenesis, Complete proteome, Disulfide bond, Glycoprotein, Proteomics identification, Reference proteome, Secreted, Signal</b>                                                                                                                                                                                      |
| <b>ECSCR</b> | <b>endothelial cell surface expressed chemotaxis and apoptosis regulator</b> | <b>Angiogenesis, Apoptosis, Cell membrane, Chemotaxis, Complete proteome, Cytoplasm, Developmental protein, Differentiation, Glycoprotein, Membrane, Phosphoprotein, Reference proteome, Signal, Transmembrane, Transmembrane helix</b>                                                                                                          |

|              |                                                |                                                                                                                                                                                                                                                                                                                                                                                                                                                                                                                                                       |
|--------------|------------------------------------------------|-------------------------------------------------------------------------------------------------------------------------------------------------------------------------------------------------------------------------------------------------------------------------------------------------------------------------------------------------------------------------------------------------------------------------------------------------------------------------------------------------------------------------------------------------------|
|              | <b>(ECSCR)</b>                                 |                                                                                                                                                                                                                                                                                                                                                                                                                                                                                                                                                       |
| <b>EFNA1</b> | <b>ephrin A1 (EFNA1)</b>                       | <b>3D-structure, Alternative splicing, Angiogenesis, Cell membrane, Complete proteome, Direct protein sequencing, Disulfide bond, Glycoprotein, GPI-anchor, Lipoprotein, Membrane, Polymorphism, Reference proteome, Secreted, Signal, Tumor suppressor</b>                                                                                                                                                                                                                                                                                           |
| <b>EFNB2</b> | <b>ephrin B2 (EFNB2)</b>                       | <b>3D-structure, Angiogenesis, Complete proteome, Developmental protein, Differentiation, Disulfide bond, Glycoprotein, Host cell receptor for virus entry, Host-virus interaction, Membrane, Methylation, Neurogenesis, Phosphoprotein, Receptor, Reference proteome, Signal, Transmembrane, Transmembrane helix</b>                                                                                                                                                                                                                                 |
| <b>EGFR</b>  | <b>epidermal growth factor receptor (EGFR)</b> | <b>3D-structure, Alternative splicing, ATP-binding, Cell membrane, Complete proteome, Developmental protein, Direct protein sequencing, Disease mutation, Disulfide bond, Endoplasmic reticulum, Endosome, Glycoprotein, Golgi apparatus, Isopeptide bond, Kinase, Membrane, Methylation, Nucleotide-binding, Nucleus, Phosphoprotein, Polymorphism, Proteomics identification, Proto-oncogene, Receptor, Reference proteome, Repeat, Secreted, Signal, Transferase, Transmembrane, Transmembrane helix, Tyrosine-protein kinase, Ubl conjugation</b> |
| <b>EREG</b>  | <b>epiregulin (EREG)</b>                       | <b>3D-structure, Angiogenesis, Cell membrane, Complete proteome, Developmental protein, Differentiation, Disulfide bond, EGF-like domain, Glycoprotein, Growth factor, Membrane, Mitogen, Polymorphism, Reference proteome, Secreted, Signal, Transmembrane, Transmembrane helix</b>                                                                                                                                                                                                                                                                  |
| <b>ECM1</b>  | <b>extracellular matrix protein 1 (ECM1)</b>   | <b>Alternative splicing, Angiogenesis, Biomineralization, Complete proteome, Disease mutation, Extracellular matrix, Glycoprotein, Mineral balance, Osteogenesis, Polymorphism, Reference</b>                                                                                                                                                                                                                                                                                                                                                         |

|             |                                                  |                                                                                                                                                                                                                                                                                                                                                                                                                                       |
|-------------|--------------------------------------------------|---------------------------------------------------------------------------------------------------------------------------------------------------------------------------------------------------------------------------------------------------------------------------------------------------------------------------------------------------------------------------------------------------------------------------------------|
|             |                                                  | <b>proteome, Repeat, Secreted, Signal</b>                                                                                                                                                                                                                                                                                                                                                                                             |
| <b>FAP</b>  | <b>fibroblast activation protein alpha (FAP)</b> | <b>3D-structure, Alternative splicing, Angiogenesis, Apoptosis, Cell adhesion, Cell junction, Cell membrane, Cell projection, Cleavage on pair of basic residues, Complete proteome, Cytoplasm, Direct protein sequencing, Disulfide bond, Glycoprotein, Hydrolase, Membrane, Polymorphism, Protease, Proteomics identification, Reference proteome, Secreted, Serine protease, Signal-anchor, Transmembrane, Transmembrane helix</b> |
| <b>FGF1</b> | <b>fibroblast growth factor 1 (FGF1)</b>         | <b>3D-structure, Acetylation, Alternative splicing, Angiogenesis, Complete proteome, Cytoplasm, Developmental protein, Differentiation, Direct protein sequencing, Growth factor, Heparin-binding, Mitogen, Nucleus, Phosphoprotein, Polymorphism, Proteomics identification, Reference proteome, Secreted</b>                                                                                                                        |
| <b>FGF2</b> | <b>fibroblast growth factor 2 (FGF2)</b>         | <b>3D-structure, Alternative initiation, Angiogenesis, Complete proteome, Developmental protein, Differentiation, Direct protein sequencing, Growth factor, Heparin-binding, Isopeptide bond, Methylation, Mitogen, Nucleus, Phosphoprotein, Proteomics identification, Reference proteome, Secreted, Ubl conjugation</b>                                                                                                             |
| <b>FGF6</b> | <b>fibroblast growth factor 6 (FGF6)</b>         | <b>Angiogenesis, Complete proteome, Developmental protein, Differentiation, Disulfide bond, Glycoprotein, Growth factor, Mitogen, Polymorphism, Proto-oncogene, Reference proteome, Secreted, Signal</b>                                                                                                                                                                                                                              |
| <b>FN1</b>  | <b>fibronectin 1 (FN1)</b>                       | <b>3D-structure, Acute phase, Alternative splicing, Angiogenesis, Cell adhesion, Cell shape, Complete proteome, Direct protein sequencing, Disease mutation, Disulfide bond, Extracellular matrix,</b>                                                                                                                                                                                                                                |

|              |                                             |                                                                                                                                                                                                                                                                                                                                                                                                                                                                                                                   |
|--------------|---------------------------------------------|-------------------------------------------------------------------------------------------------------------------------------------------------------------------------------------------------------------------------------------------------------------------------------------------------------------------------------------------------------------------------------------------------------------------------------------------------------------------------------------------------------------------|
|              |                                             | <b>Glycoprotein, Heparin-binding, Isopeptide bond, Phosphoprotein, Polymorphism, Proteomics identification, Pyrrolidone carboxylic acid, Reference proteome, Repeat, Secreted, Signal, Sulfation</b>                                                                                                                                                                                                                                                                                                              |
| <b>FLT1</b>  | <b>fms related tyrosine kinase 1 (FLT1)</b> | <b>3D-structure, Alternative splicing, Angiogenesis, ATP-binding, Cell membrane, Chemotaxis, Complete proteome, Cytoplasm, Developmental protein, Differentiation, Direct protein sequencing, Disulfide bond, Endosome, Glycoprotein, Immunoglobulin domain, Kinase, Membrane, Nucleotide-binding, Phosphoprotein, Polymorphism, Proteomics identification, Receptor, Reference proteome, Repeat, Secreted, Signal, Transferase, Transmembrane, Transmembrane helix, Tyrosine-protein kinase, Ubl conjugation</b> |
| <b>FLT4</b>  | <b>fms related tyrosine kinase 4 (FLT4)</b> | <b>3D-structure, Alternative splicing, Angiogenesis, ATP-binding, Cell membrane, Complete proteome, Cytoplasm, Direct protein sequencing, Disease mutation, Disulfide bond, Glycoprotein, Immunoglobulin domain, Kinase, Membrane, Nucleotide-binding, Nucleus, Phosphoprotein, Polymorphism, Proteomics identification, Receptor, Reference proteome, Repeat, Secreted, Signal, Transferase, Transmembrane, Transmembrane helix, Tyrosine-protein kinase</b>                                                     |
| <b>FOXC1</b> | <b>forkhead box C1 (FOXC1)</b>              | <b>Complete proteome, Deafness, Disease mutation, DNA-binding, Nucleus, Peters anomaly, Phosphoprotein, Polymorphism, Reference proteome, Transcription, Transcription regulation</b>                                                                                                                                                                                                                                                                                                                             |
| <b>FMNL3</b> | <b>formin like 3 (FMNL3)</b>                | <b>Alternative splicing, Angiogenesis, Cell membrane, Coiled coil, Complete proteome, Cytoplasm, Developmental protein, Lipoprotein, Membrane, Myristate, Phosphoprotein, Proteomics identification, Reference proteome</b>                                                                                                                                                                                                                                                                                       |
| <b>GLUL</b>  | <b>glutamate-ammonia</b>                    | <b>3D-structure, Acetylation, ATP-binding, Complete proteome, Cytoplasm, Disease mutation, Ligase,</b>                                                                                                                                                                                                                                                                                                                                                                                                            |

|              |                                                               |                                                                                                                                                                                                                                                                                                                                                                                         |
|--------------|---------------------------------------------------------------|-----------------------------------------------------------------------------------------------------------------------------------------------------------------------------------------------------------------------------------------------------------------------------------------------------------------------------------------------------------------------------------------|
|              | <b>ligase (GLUL)</b>                                          | <b>Lyase, Mitochondrion, Nucleotide-binding, Phosphoprotein, Reference proteome, Ubl conjugation</b>                                                                                                                                                                                                                                                                                    |
| <b>GDF2</b>  | <b>growth differentiation factor 2 (GDF2)</b>                 | <b>3D-structure, Angiogenesis, Cleavage on pair of basic residues, Complete proteome, Cytokine, Disease mutation, Disulfide bond, Glycoprotein, Growth factor, Reference proteome, Secreted, Signal</b>                                                                                                                                                                                 |
| <b>HAND2</b> | <b>heart and neural crest derivatives expressed 2 (HAND2)</b> | <b>Alternative splicing, Angiogenesis, Complete proteome, Developmental protein, Differentiation, DNA-binding, Nucleus, Reference proteome, Transcription, Transcription regulation</b>                                                                                                                                                                                                 |
| <b>HBA1</b>  | <b>hemoglobin subunit alpha 1 (HBA1)</b>                      | <b>3D-structure, Acetylation, Complete proteome, Direct protein sequencing, Disease mutation, Glycation, Glycoprotein, Heme, Hereditary hemolytic anemia, Iron, Metal-binding, Oxygen transport, Phosphoprotein, Polymorphism, Reference proteome, Transport</b>                                                                                                                        |
| <b>HSPG2</b> | <b>heparan sulfate proteoglycan 2 (HSPG2)</b>                 | <b>3D-structure, Angiogenesis, Basement membrane, Calcium, Complete proteome, Direct protein sequencing, Disease mutation, Disulfide bond, EGF-like domain, Extracellular matrix, Glycoprotein, Heparan sulfate, Immunoglobulin domain, Laminin EGF-like domain, Metal-binding, Polymorphism, Proteoglycan, Proteomics identification, Reference proteome, Repeat, Secreted, Signal</b> |
| <b>HRG</b>   | <b>histidine rich glycoprotein (HRG)</b>                      | <b>Angiogenesis, Blood coagulation, Chemotaxis, Cleavage on pair of basic residues, Complete proteome, Copper, Direct protein sequencing, Disease mutation, Disulfide bond, Fibrinolysis, Glycoprotein, Hemostasis, Heparin-binding, Metal-binding, Polymorphism, Reference proteome, Repeat, Secreted, Signal, Thrombophilia, Zinc</b>                                                 |



|                 |                                                             |                                                                                                                                                                                                                                                                                                                                                                 |
|-----------------|-------------------------------------------------------------|-----------------------------------------------------------------------------------------------------------------------------------------------------------------------------------------------------------------------------------------------------------------------------------------------------------------------------------------------------------------|
| <b>HIF1A</b>    | <b>hypoxia inducible factor 1 alpha subunit (HIF1A)</b>     | <b>3D-structure, Acetylation, Activator, Alternative splicing, Complete proteome, Cytoplasm, Direct protein sequencing, DNA-binding, Hydroxylation, Isopeptide bond, Nucleus, Phosphoprotein, Polymorphism, Proteomics identification, Reference proteome, Repeat, S-nitrosylation, Transcription, Transcription regulation, Ubl conjugation</b>                |
| <b>HIF3A</b>    | <b>hypoxia inducible factor 3 alpha subunit (HIF3A)</b>     | <b>3D-structure, Alternative splicing, Angiogenesis, Apoptosis, Complete proteome, Cytoplasm, Developmental protein, Hydroxylation, Isopeptide bond, Mitochondrion, Nucleus, Polymorphism, Reference proteome, Repeat, Repressor, Stress response, Transcription, Transcription regulation, Tumor suppressor, Ubl conjugation</b>                               |
| <b>ITGB1BP1</b> | <b>integrin subunit beta 1 binding protein 1 (ITGB1BP1)</b> | <b>3D-structure, Alternative splicing, Angiogenesis, Biom mineralization, Cell adhesion, Cell membrane, Cell projection, Complete proteome, Cytoplasm, Cytoskeleton, Differentiation, Integrin, Membrane, Mitogen, Notch signaling pathway, Nucleus, Phosphoprotein, Proteomics identification, Reference proteome, Transcription, Transcription regulation</b> |
| <b>IL6</b>      | <b>interleukin 6 (IL6)</b>                                  | <b>3D-structure, Acute phase, Complete proteome, Cytokine, Direct protein sequencing, Disulfide bond, Glycoprotein, Growth factor, Phosphoprotein, Polymorphism, Proteomics identification, Reference proteome, Secreted, Signal</b>                                                                                                                            |
| <b>JAM3</b>     | <b>junctional adhesion molecule 3 (JAM3)</b>                | <b>Alternative splicing, Angiogenesis, Cell adhesion, Cell junction, Cell membrane, Complete proteome, Direct protein sequencing, Disease mutation, Disulfide bond, Glycoprotein, Immunoglobulin domain, Membrane, Proteomics identification, Reference proteome, Secreted, Signal, Transmembrane, Transmembrane helix</b>                                      |

|              |                                                   |                                                                                                                                                                                                                                                                                                                                                                                                                                                                                                                                             |
|--------------|---------------------------------------------------|---------------------------------------------------------------------------------------------------------------------------------------------------------------------------------------------------------------------------------------------------------------------------------------------------------------------------------------------------------------------------------------------------------------------------------------------------------------------------------------------------------------------------------------------|
| <b>KDR</b>   | <b>kinase insert domain receptor (KDR)</b>        | <b>3D-structure, Alternative splicing, Angiogenesis, ATP-binding, Cell junction, Cell membrane, Complete proteome, Cytoplasm, Cytoplasmic vesicle, Developmental protein, Differentiation, Disulfide bond, Endoplasmic reticulum, Endosome, Glycoprotein, Host-virus interaction, Immunoglobulin domain, Kinase, Membrane, Nucleotide-binding, Nucleus, Phosphoprotein, Polymorphism, Receptor, Reference proteome, Repeat, Secreted, Signal, Transferase, Transmembrane, Transmembrane helix, Tyrosine-protein kinase, Ubl conjugation</b> |
| <b>MMP19</b> | <b>matrix metalloproteinase 19 (MMP19)</b>        | <b>Alternative splicing, Angiogenesis, Calcium, Collagen degradation, Complete proteome, Developmental protein, Differentiation, Direct protein sequencing, Disulfide bond, Extracellular matrix, Glycoprotein, Hydrolase, Metal-binding, Metalloprotease, Phosphoprotein, Polymorphism, Protease, Proteomics identification, Reference proteome, Repeat, Secreted, Signal, Zinc, Zymogen</b>                                                                                                                                               |
| <b>MMP2</b>  | <b>matrix metalloproteinase 2 (MMP2)</b>          | <b>3D-structure, Alternative splicing, Angiogenesis, Autocatalytic cleavage, Calcium, Collagen degradation, Complete proteome, Cytoplasm, Direct protein sequencing, Disease mutation, Disulfide bond, Extracellular matrix, Glycoprotein, Hydrolase, Membrane, Metal-binding, Metalloprotease, Mitochondrion, Nucleus, Phosphoprotein, Polymorphism, Protease, Proteomics identification, Reference proteome, Repeat, Secreted, Signal, Zinc, Zymogen</b>                                                                                  |
| <b>MVD</b>   | <b>mevalonate diphosphate decarboxylase (MVD)</b> | <b>3D-structure, Acetylation, ATP-binding, Cholesterol biosynthesis, Cholesterol metabolism, Complete proteome, Disease mutation, Lipid biosynthesis, Lipid metabolism, Lyase, Nucleotide-binding, Phosphoprotein, Polymorphism, Proteomics identification, Reference proteome, Steroid biosynthesis, Steroid metabolism, Sterol biosynthesis, Sterol metabolism</b>                                                                                                                                                                        |

|               |                                                                 |                                                                                                                                                                                                                                                                                                                                                                                                               |
|---------------|-----------------------------------------------------------------|---------------------------------------------------------------------------------------------------------------------------------------------------------------------------------------------------------------------------------------------------------------------------------------------------------------------------------------------------------------------------------------------------------------|
| <b>MINAR1</b> | <b>Major intrinsically disordered Notch2-binding receptor 1</b> | <b>Angiogenesis</b>                                                                                                                                                                                                                                                                                                                                                                                           |
| <b>MFGE8</b>  | <b>milk fat globule-EGF factor 8 protein (MFGE8)</b>            | <b>Alternative splicing, Amyloid, Angiogenesis, Cell adhesion, Complete proteome, Direct protein sequencing, Disulfide bond, EGF-like domain, Fertilization, Glycoprotein, Host-virus interaction, Membrane, Phosphoprotein, Polymorphism, Proteomics identification, Reference proteome, Repeat, Secreted, Signal</b>                                                                                        |
| <b>MAPK1</b>  | <b>mitogen-activated protein kinase 1 (MAPK1)</b>               | <b>3D-structure, Acetylation, Alternative splicing, Apoptosis, ATP-binding, Cell cycle, Complete proteome, Cytoplasm, Cytoskeleton, Direct protein sequencing, DNA-binding, Host-virus interaction, Kinase, Magnesium, Nucleotide-binding, Nucleus, Phosphoprotein, Reference proteome, Repressor, Serine/threonine-protein kinase, Transcription, Transcription regulation, Transferase, Ubl conjugation</b> |
| <b>MMRN2</b>  | <b>multimerin 2 (MMRN2)</b>                                     | <b>Angiogenesis, Coiled coil, Complete proteome, Disulfide bond, Extracellular matrix, Glycoprotein, Polymorphism, Proteomics identification, Reference proteome, Secreted, Signal</b>                                                                                                                                                                                                                        |
| <b>MYDGF</b>  | <b>myeloid derived growth factor (MYDGF)</b>                    | <b>Angiogenesis, Apoptosis, Complete proteome, Direct protein sequencing, Polymorphism, Proteomics identification, Reference proteome, Secreted, Signal</b>                                                                                                                                                                                                                                                   |
| <b>NRXN1</b>  | <b>neurexin 1 (NRXN1)</b>                                       | <b>3D-structure, Alternative promoter usage, Alternative splicing, Angiogenesis, Calcium, Cell adhesion, Cell junction, Cell membrane, Complete proteome, Disulfide bond, EGF-like domain, Glycoprotein,</b>                                                                                                                                                                                                  |

|               |                             |                                                                                                                                                                                                                                                                                                                                                                                                                                                                                                              |
|---------------|-----------------------------|--------------------------------------------------------------------------------------------------------------------------------------------------------------------------------------------------------------------------------------------------------------------------------------------------------------------------------------------------------------------------------------------------------------------------------------------------------------------------------------------------------------|
|               |                             | <b>Membrane, Metal-binding, Polymorphism, Proteomics identification, Reference proteome, Repeat, Signal, Synapse, Transmembrane, Transmembrane helix</b>                                                                                                                                                                                                                                                                                                                                                     |
| <b>NRXN3</b>  | <b>neurexin 3 (NRXN3)</b>   | <b>Alternative promoter usage, Alternative splicing, Angiogenesis, Calcium, Cell adhesion, Complete proteome, Disulfide bond, EGF-like domain, Glycoprotein, Membrane, Metal-binding, Proteomics identification, Reference proteome, Repeat, Signal, Transmembrane, Transmembrane helix</b>                                                                                                                                                                                                                  |
| <b>NRP1</b>   | <b>neuropilin 1 (NRP1)</b>  | <b>3D-structure, Alternative splicing, Angiogenesis, Calcium, Cell membrane, Complete proteome, Developmental protein, Differentiation, Direct protein sequencing, Disulfide bond, Glycoprotein, Heparan sulfate, Heparin-binding, Membrane, Metal-binding, Neurogenesis, Phosphoprotein, Polymorphism, Proteoglycan, Proteomics identification, Receptor, Reference proteome, Repeat, Secreted, Signal, Transmembrane, Transmembrane helix</b>                                                              |
| <b>NOTCH1</b> | <b>notch 1 (NOTCH1)</b>     | <b>3D-structure, Activator, Angiogenesis, ANK repeat, Calcium, Cell membrane, Complete proteome, Developmental protein, Differentiation, Direct protein sequencing, Disease mutation, Disulfide bond, EGF-like domain, Glycoprotein, Hydroxylation, Isopeptide bond, Membrane, Metal-binding, Notch signaling pathway, Nucleus, Phosphoprotein, Polymorphism, Receptor, Reference proteome, Repeat, Signal, Transcription, Transcription regulation, Transmembrane, Transmembrane helix, Ubl conjugation</b> |
| <b>PARVA</b>  | <b>parvin alpha (PARVA)</b> | <b>3D-structure, Acetylation, Actin-binding, Alternative splicing, Angiogenesis, Cell adhesion, Cell junction, Cell membrane, Cell shape, Chemotaxis, Cilium biogenesis/degradation, Complete proteome, Cytoplasm, Cytoskeleton, Direct protein sequencing, Membrane, Phosphoprotein,</b>                                                                                                                                                                                                                    |

|               |                                                                                             |                                                                                                                                                                                                                                                                                                          |
|---------------|---------------------------------------------------------------------------------------------|----------------------------------------------------------------------------------------------------------------------------------------------------------------------------------------------------------------------------------------------------------------------------------------------------------|
|               |                                                                                             | <b>Proteomics identification, Reference proteome, Repeat</b>                                                                                                                                                                                                                                             |
| <b>PDCL3</b>  | <b>phosducin like 3<br/>(PDCL3)</b>                                                         | <b>Angiogenesis, Apoptosis, Coiled coil, Complete proteome, Cytoplasm, Host-virus interaction, Phosphoprotein, Proteomics identification, Reference proteome</b>                                                                                                                                         |
| <b>PIK3CA</b> | <b>phosphatidylinositol-4, 5-bisphosphate 3-kinase catalytic subunit alpha<br/>(PIK3CA)</b> | <b>3D-structure, Angiogenesis, ATP-binding, Complete proteome, Disease mutation, Kinase, Nucleotide-binding, Phagocytosis, Polymorphism, Proteomics identification, Proto-oncogene, Reference proteome, Serine/threonine-protein kinase, Transferase</b>                                                 |
| <b>PIK3CG</b> | <b>phosphatidylinositol-4, 5-bisphosphate 3-kinase catalytic subunit gamma<br/>(PIK3CG)</b> | <b>3D-structure, Angiogenesis, ATP-binding, Cell membrane, Chemotaxis, Complete proteome, Cytoplasm, Endocytosis, Immunity, Inflammatory response, Kinase, Membrane, Nucleotide-binding, Phosphoprotein, Proteomics identification, Reference proteome, Serine/threonine-protein kinase, Transferase</b> |
| <b>PDE3B</b>  | <b>phosphodiesterase 3B (PDE3B)</b>                                                         | <b>3D-structure, Alternative splicing, Angiogenesis, cAMP, cGMP, Complete proteome, Hydrolase, Membrane, Metal-binding, Phosphoprotein, Polymorphism, Reference proteome, Transmembrane, Transmembrane helix</b>                                                                                         |
| <b>PIK3R6</b> | <b>phosphoinositide-3-kinase regulatory subunit 6 (PIK3R6)</b>                              | <b>Angiogenesis, Cell membrane, Complete proteome, Cytoplasm, Kinase, Membrane, Reference proteome, Transferase</b>                                                                                                                                                                                      |

|               |                                                                   |                                                                                                                                                                                                                                                                                                                                                 |
|---------------|-------------------------------------------------------------------|-------------------------------------------------------------------------------------------------------------------------------------------------------------------------------------------------------------------------------------------------------------------------------------------------------------------------------------------------|
| <b>PGF</b>    | <b>placental growth factor (PGF)</b>                              | <b>3D-structure, Alternative splicing, Angiogenesis, Complete proteome, Developmental protein, Differentiation, Direct protein sequencing, Disulfide bond, Glycoprotein, Growth factor, Heparin-binding, Mitogen, Proteomics identification, Reference proteome, Secreted, Signal</b>                                                           |
| <b>PECAM1</b> | <b>platelet and endothelial cell adhesion molecule 1 (PECAM1)</b> | <b>3D-structure, Alternative splicing, Cell adhesion, Cell junction, Cell membrane, Complete proteome, Disulfide bond, Glycoprotein, Immunoglobulin domain, Lipoprotein, Membrane, Palmitate, Phagocytosis, Phosphoprotein, Polymorphism, Proteomics identification, Reference proteome, Repeat, Signal, Transmembrane, Transmembrane helix</b> |
| <b>PLXND1</b> | <b>plexin D1 (PLXND1)</b>                                         | <b>3D-structure, Alternative splicing, Angiogenesis, Cell membrane, Complete proteome, Developmental protein, Disulfide bond, Glycoprotein, Membrane, Polymorphism, Proteomics identification, Receptor, Reference proteome, Repeat, Signal, Transmembrane, Transmembrane helix</b>                                                             |
| <b>PDCD10</b> | <b>programmed cell death 10 (PDCD10)</b>                          | <b>3D-structure, Acetylation, Angiogenesis, Apoptosis, Cell membrane, Complete proteome, Cytoplasm, Direct protein sequencing, Golgi apparatus, Membrane, Polymorphism, Proteomics identification, Reference proteome</b>                                                                                                                       |
| <b>PDCD6</b>  | <b>programmed cell death 6 (PDCD6)</b>                            | <b>3D-structure, Acetylation, Alternative splicing, Angiogenesis, Apoptosis, Calcium, Complete proteome, Endoplasmic reticulum, Endosome, Membrane, Metal-binding, Nucleus, Polymorphism, Proteomics identification, Reference proteome, Repeat</b>                                                                                             |
| <b>PROK1</b>  | <b>prokineticin 1 (PROK1)</b>                                     | <b>Angiogenesis, Complete proteome, Direct protein sequencing, Disulfide bond, Growth factor, Mitogen, Polymorphism, Reference proteome, Secreted, Signal</b>                                                                                                                                                                                   |
| <b>PTGS2</b>  | <b>prostaglandin-</b>                                             | <b>3D-structure, Complete proteome, Dioxygenase, Disulfide bond, Endoplasmic reticulum, Fatty acid</b>                                                                                                                                                                                                                                          |

|              |                                        |                                                                                                                                                                                                                                                                                                                                                                                                                           |
|--------------|----------------------------------------|---------------------------------------------------------------------------------------------------------------------------------------------------------------------------------------------------------------------------------------------------------------------------------------------------------------------------------------------------------------------------------------------------------------------------|
|              | <b>endoperoxide synthase 2 (PTGS2)</b> | <b>biosynthesis, Fatty acid metabolism, Glycoprotein, Heme, Iron, Lipid biosynthesis, Lipid metabolism, Membrane, Metal-binding, Microsome, Oxidoreductase, Peroxidase, Polymorphism, Prostaglandin biosynthesis, Prostaglandin metabolism, Reference proteome, S-nitrosylation, Signal</b>                                                                                                                               |
| <b>PRKCA</b> | <b>protein kinase C alpha (PRKCA)</b>  | <b>3D-structure, Acetylation, Angiogenesis, Apoptosis, ATP-binding, Calcium, Cell adhesion, Cell membrane, Complete proteome, Cytoplasm, Direct protein sequencing, Kinase, Membrane, Metal-binding, Mitochondrion, Nucleotide-binding, Nucleus, Phosphoprotein, Polymorphism, Proteomics identification, Proto-oncogene, Reference proteome, Repeat, Serine/threonine-protein kinase, Transferase, Zinc, Zinc-finger</b> |
| <b>PRKD1</b> | <b>protein kinase D1 (PRKD1)</b>       | <b>Angiogenesis, Apoptosis, ATP-binding, Cell membrane, Complete proteome, Cytoplasm, Differentiation, Golgi apparatus, Immunity, Inflammatory response, Innate immunity, Kinase, Magnesium, Membrane, Metal-binding, Neurogenesis, Nucleotide-binding, Phosphoprotein, Polymorphism, Proteomics identification, Reference proteome, Repeat, Serine/threonine-protein kinase, Transferase, Zinc, Zinc-finger</b>          |
| <b>PRKD2</b> | <b>protein kinase D2 (PRKD2)</b>       | <b>3D-structure, Adaptive immunity, Alternative splicing, Angiogenesis, ATP-binding, Cell adhesion, Cell membrane, Complete proteome, Cytoplasm, Golgi apparatus, Immunity, Kinase, Magnesium, Membrane, Metal-binding, Nucleotide-binding, Nucleus, Phosphoprotein, Polymorphism, Proteomics identification, Reference proteome, Repeat, Serine/threonine-protein kinase, Transferase, Zinc, Zinc-finger</b>             |
| <b>PRKX</b>  | <b>protein kinase, X-</b>              | <b>Acetylation, Angiogenesis, ATP-binding, cAMP, Chromosomal rearrangement, Complete proteome,</b>                                                                                                                                                                                                                                                                                                                        |

|              |                                                              |                                                                                                                                                                                                                                                                                                                                                                                                                                               |
|--------------|--------------------------------------------------------------|-----------------------------------------------------------------------------------------------------------------------------------------------------------------------------------------------------------------------------------------------------------------------------------------------------------------------------------------------------------------------------------------------------------------------------------------------|
|              | <b>linked (PRKX)</b>                                         | <b>Cytoplasm, Developmental protein, Differentiation, Kinase, Nucleotide-binding, Nucleus, Phosphoprotein, Polymorphism, Reference proteome, Serine/threonine-protein kinase, Transferase</b>                                                                                                                                                                                                                                                 |
| <b>PTK2B</b> | <b>protein tyrosine kinase 2 beta (PTK2B)</b>                | <b>3D-structure, Adaptive immunity, Alternative splicing, Angiogenesis, ATP-binding, Cell junction, Cell membrane, Cell projection, Complete proteome, Cytoplasm, Immunity, Kinase, Membrane, Nucleotide-binding, Nucleus, Phosphoprotein, Polymorphism, Proteomics identification, Reference proteome, Transferase, Tyrosine-protein kinase</b>                                                                                              |
| <b>PTK2</b>  | <b>protein tyrosine kinase 2 (PTK2)</b>                      | <b>3D-structure, Acetylation, Alternative promoter usage, Alternative splicing, Angiogenesis, ATP-binding, Cell junction, Cell membrane, Complete proteome, Cytoplasm, Cytoskeleton, Developmental protein, Direct protein sequencing, Isopeptide bond, Kinase, Membrane, Nucleotide-binding, Nucleus, Phosphoprotein, Polymorphism, Proteomics identification, Reference proteome, Transferase, Tyrosine-protein kinase, Ubl conjugation</b> |
| <b>PTPRB</b> | <b>protein tyrosine phosphatase, receptor type B (PTPRB)</b> | <b>3D-structure, Alternative splicing, Angiogenesis, Complete proteome, Glycoprotein, Hydrolase, Membrane, Polymorphism, Protein phosphatase, Proteomics identification, Reference proteome, Repeat, Signal, Transmembrane, Transmembrane helix</b>                                                                                                                                                                                           |
| <b>RHOB</b>  | <b>ras homolog family member B (RHOB)</b>                    | <b>3D-structure, ADP-ribosylation, Angiogenesis, Apoptosis, Cell adhesion, Cell membrane, Complete proteome, Developmental protein, Differentiation, Direct protein sequencing, Endosome, Glycoprotein, GTP-binding, Lipoprotein, Membrane, Methylation, Nucleotide-binding, Nucleus, Palmitate, Phosphoprotein, Prenylation, Protein transport, Reference proteome, Transport, Tumor</b>                                                     |



|               |                                               |                                                                                                                                                                                                                                                                                                                                                                                                   |
|---------------|-----------------------------------------------|---------------------------------------------------------------------------------------------------------------------------------------------------------------------------------------------------------------------------------------------------------------------------------------------------------------------------------------------------------------------------------------------------|
|               |                                               | <b>suppressor</b>                                                                                                                                                                                                                                                                                                                                                                                 |
| <b>RHOJ</b>   | <b>ras homolog family member J (RHOJ)</b>     | <b>Alternative splicing, Cell membrane, Cell shape, Complete proteome, GTP-binding, Lipoprotein, Membrane, Methylation, Nucleotide-binding, Prenylation, Reference proteome</b>                                                                                                                                                                                                                   |
| <b>RNF213</b> | <b>ring finger protein 213 (RNF213)</b>       | <b>Alternative splicing, Angiogenesis, Chromosomal rearrangement, Coiled coil, Complete proteome, Cytoplasm, Disease mutation, Hydrolase, Isopeptide bond, Ligase, Metal-binding, Phosphoprotein, Proteomics identification, Proto-oncogene, Reference proteome, Ubl conjugation, Ubl conjugation pathway, Zinc, Zinc-finger</b>                                                                  |
| <b>ROBO4</b>  | <b>roundabout guidance receptor 4 (ROBO4)</b> | <b>Alternative splicing, Angiogenesis, Complete proteome, Developmental protein, Differentiation, Disulfide bond, Glycoprotein, Immunoglobulin domain, Phosphoprotein, Polymorphism, Proteomics identification, Receptor, Reference proteome, Repeat, Signal</b>                                                                                                                                  |
| <b>SEMA3E</b> | <b>semaphorin 3E (SEMA3E)</b>                 | <b>Alternative splicing, Angiogenesis, Complete proteome, Developmental protein, Differentiation, Disulfide bond, Glycoprotein, Immunoglobulin domain, Neurogenesis, Proteomics identification, Reference proteome, Secreted, Signal</b>                                                                                                                                                          |
| <b>SEMA4A</b> | <b>semaphorin 4A (SEMA4A)</b>                 | <b>Adaptive immunity, Alternative splicing, Angiogenesis, Cell membrane, Complete proteome, Cone-rod dystrophy, Developmental protein, Differentiation, Disease mutation, Disulfide bond, Glycoprotein, Immunity, Immunoglobulin domain, Membrane, Neurogenesis, Polymorphism, Proteomics identification, Reference proteome, Retinitis pigmentosa, Signal, Transmembrane, Transmembrane heli</b> |
| <b>S1PR1</b>  | <b>sphingosine-1-</b>                         | <b>3D-structure, Acetylation, Angiogenesis, Cell membrane, Chemotaxis, Complete proteome, Disulfide</b>                                                                                                                                                                                                                                                                                           |

|                |                                                            |                                                                                                                                                                                                                                                                                                                                                            |
|----------------|------------------------------------------------------------|------------------------------------------------------------------------------------------------------------------------------------------------------------------------------------------------------------------------------------------------------------------------------------------------------------------------------------------------------------|
|                | <b>phosphate receptor 1 (S1PR1)</b>                        | <b>bond, Endosome, G-protein coupled receptor, Glycoprotein, Lipoprotein, Membrane, Palmitate, Phosphoprotein, Polymorphism, Receptor, Reference proteome, Transducer, Transmembrane, Transmembrane helix</b>                                                                                                                                              |
| <b>SYK</b>     | <b>spleen associated tyrosine kinase (SYK)</b>             | <b>3D-structure, Adaptive immunity, Alternative splicing, Angiogenesis, ATP-binding, Cell membrane, Complete proteome, Cytoplasm, Host-virus interaction, Immunity, Innate immunity, Kinase, Membrane, Nucleotide-binding, Phosphoprotein, Polymorphism, Reference proteome, Repeat, SH2 domain, Transferase, Tyrosine-protein kinase, Ubl conjugation</b> |
| <b>SRPX2</b>   | <b>sushi repeat containing protein, X-linked 2 (SRPX2)</b> | <b>Angiogenesis, Cell adhesion, Cell junction, Complete proteome, Cytoplasm, Disease mutation, Disulfide bond, Epilepsy, Glycoprotein, Mental retardation, Polymorphism, Proteoglycan, Reference proteome, Repeat, Secreted, Signal, Sushi, Synapse</b>                                                                                                    |
| <b>TSPAN12</b> | <b>tetraspanin 12 (TSPAN12)</b>                            | <b>Alternative splicing, Angiogenesis, Cell membrane, Complete proteome, Disease mutation, Lipoprotein, Membrane, Palmitate, Polymorphism, Reference proteome, Transmembrane, Transmembrane helix</b>                                                                                                                                                      |
| <b>THBS1</b>   | <b>thrombospondin 1 (THBS1)</b>                            | <b>3D-structure, Alternative splicing, Calcium, Cell adhesion, Complete proteome, Disulfide bond, EGF-like domain, Endoplasmic reticulum, Glycoprotein, Heparin-binding, Polymorphism, Proteomics identification, Reference proteome, Repeat, Sarcoplasmic reticulum, Signal, Unfolded protein response</b>                                                |
| <b>THSD7A</b>  | <b>thrombospondin type 1 domain</b>                        | <b>Angiogenesis, Cell membrane, Coiled coil, Complete proteome, Differentiation, Disulfide bond, Glycoprotein, Membrane, Polymorphism, Proteomics identification, Reference proteome, Repeat,</b>                                                                                                                                                          |

|                |                                                                          |                                                                                                                                                                                                                                                                                                                                                         |
|----------------|--------------------------------------------------------------------------|---------------------------------------------------------------------------------------------------------------------------------------------------------------------------------------------------------------------------------------------------------------------------------------------------------------------------------------------------------|
|                | <b>containing 7A<br/>(THSD7A)</b>                                        | <b>Secreted, Signal, Transmembrane, Transmembrane helix</b>                                                                                                                                                                                                                                                                                             |
| <b>TYMP</b>    | <b>thymidine<br/>phosphorylase<br/>(TYMP)</b>                            | <b>3D-structure, Alternative splicing, Angiogenesis, Chemotaxis, Complete proteome, Developmental protein, Differentiation, Direct protein sequencing, Disease mutation, Glycosyltransferase, Growth factor, Phosphoprotein, Polymorphism, Progressive external ophthalmoplegia, Proteomics identification, Reference proteome, Repeat, Transferase</b> |
| <b>WARS</b>    | <b>tryptophanyl-tRNA<br/>synthetase (WARS)</b>                           | <b>3D-structure, Alternative splicing, Aminoacyl-tRNA synthetase, Angiogenesis, ATP-binding, Complete proteome, Cytoplasm, Direct protein sequencing, Ligase, Nucleotide-binding, Phosphoprotein, Polymorphism, Protein biosynthesis, Proteomics identification, Reference proteome</b>                                                                 |
| <b>TNFSF12</b> | <b>tumor necrosis<br/>factor superfamily<br/>member 12<br/>(TNFSF12)</b> | <b>3D-structure, Alternative splicing, Angiogenesis, Apoptosis, Cell membrane, Cleavage on pair of basic residues, Complete proteome, Cytokine, Developmental protein, Differentiation, Disulfide bond, Glycoprotein, Membrane, Reference proteome, Secreted, Signal-anchor, Transmembrane, Transmembrane helix</b>                                     |
| <b>TNF</b>     | <b>tumor necrosis<br/>factor (TNF)</b>                                   | <b>3D-structure, Cell membrane, Complete proteome, Cytokine, Direct protein sequencing, Disulfide bond, Glycoprotein, Lipoprotein, Membrane, Myristate, Phosphoprotein, Polymorphism, Proteomics identification, Reference proteome, Secreted, Signal-anchor, Transmembrane, Transmembrane helix</b>                                                    |
| <b>TIE1</b>    | <b>tyrosine kinase with<br/>immunoglobulin like<br/>and EGF like</b>     | <b>Alternative splicing, Angiogenesis, ATP-binding, Cell membrane, Complete proteome, Direct protein sequencing, Disulfide bond, EGF-like domain, Glycoprotein, Immunoglobulin domain, Kinase, Membrane, Nucleotide-binding, Phosphoprotein, Polymorphism, Receptor, Reference proteome,</b>                                                            |

|              |                                                        |                                                                                                                                                                                                                                                                                                                                           |
|--------------|--------------------------------------------------------|-------------------------------------------------------------------------------------------------------------------------------------------------------------------------------------------------------------------------------------------------------------------------------------------------------------------------------------------|
|              | <b>domains 1 (TIE1)</b>                                | <b>Repeat, Signal, Transferase, Transmembrane, Transmembrane helix, Tyrosine-protein kinase</b>                                                                                                                                                                                                                                           |
| <b>UNC5B</b> | <b>unc-5 netrin receptor B (UNC5B)</b>                 | <b>Alternative splicing, Angiogenesis, Apoptosis, Cell membrane, Complete proteome, Developmental protein, Disulfide bond, Glycoprotein, Immunoglobulin domain, Lipoprotein, Membrane, Palmitate, Phosphoprotein, Polymorphism, Receptor, Reference proteome, Repeat, Signal, Transmembrane, Transmembrane helix</b>                      |
| <b>VEGFA</b> | <b>vascular endothelial growth factor A (VEGFA)</b>    | <b>3D-structure, Alternative initiation, Alternative promoter usage, Alternative splicing, Angiogenesis, Complete proteome, Developmental protein, Differentiation, Direct protein sequencing, Disulfide bond, Glycoprotein, Growth factor, Heparin-binding, Mitogen, Proteomics identification, Reference proteome, Secreted, Signal</b> |
| <b>VEGFC</b> | <b>vascular endothelial growth factor C (VEGFC)</b>    | <b>3D-structure, Angiogenesis, Cleavage on pair of basic residues, Complete proteome, Developmental protein, Differentiation, Direct protein sequencing, Disulfide bond, Glycoprotein, Growth factor, Mitogen, Reference proteome, Repeat, Secreted, Signal</b>                                                                           |
| <b>VEGFD</b> | <b>vascular endothelial growth factor D (VEGFD)</b>    | <b>3D-structure, Angiogenesis, Cleavage on pair of basic residues, Complete proteome, Developmental protein, Differentiation, Direct protein sequencing, Disulfide bond, Glycoprotein, Growth factor, Mitogen, Reference proteome, Repeat, Secreted, Signal</b>                                                                           |
| <b>VAV2</b>  | <b>vav guanine nucleotide exchange factor 2 (VAV2)</b> | <b>3D-structure, Alternative splicing, Angiogenesis, Complete proteome, Guanine-nucleotide releasing factor, Metal-binding, Phosphoprotein, Polymorphism, Reference proteome, Repeat, SH2 domain, SH3 domain, Zinc, Zinc-finger</b>                                                                                                       |
| <b>VAV3</b>  | <b>vav guanine</b>                                     | <b>3D-structure, Alternative promoter usage, Alternative splicing, Angiogenesis, Complete proteome,</b>                                                                                                                                                                                                                                   |

|                |                                                       |                                                                                                                                                                                                                                                                                                                                                                                                                                                                                                                         |
|----------------|-------------------------------------------------------|-------------------------------------------------------------------------------------------------------------------------------------------------------------------------------------------------------------------------------------------------------------------------------------------------------------------------------------------------------------------------------------------------------------------------------------------------------------------------------------------------------------------------|
|                | <b>nucleotide exchange factor 3 (VAV3)</b>            | <b>Guanine-nucleotide releasing factor, Metal-binding, Phosphoprotein, Polymorphism, Proteomics identification, Reference proteome, Repeat, SH2 domain, SH3 domain, Zinc, Zinc-finger</b>                                                                                                                                                                                                                                                                                                                               |
| <b>ZC3H12A</b> | <b>zinc finger CCCH-type containing 12A (ZC3H12A)</b> | <b>3D-structure, Angiogenesis, Antiviral defense, Apoptosis, Complete proteome, Cytoplasm, Developmental protein, Differentiation, DNA damage, DNA-binding, Endonuclease, Endoplasmic reticulum, Hydrolase, Immunity, Inflammatory response, Magnesium, Membrane, Metal-binding, Neurogenesis, Nuclease, Nucleus, Phosphoprotein, Polymorphism, Proteomics identification, Reference proteome, Repressor, RNA-binding, Stress response, Transcription, Transcription regulation, Ubl conjugation, Zinc, Zinc-finger</b> |
| <b>ZNF304</b>  | <b>zinc finger protein 304 (ZNF304)</b>               | <b>Activator, Angiogenesis, Chromatin regulator, Complete proteome, DNA-binding, Metal-binding, Nucleus, Polymorphism, Proteomics identification, Reference proteome, Repeat, Transcription, Transcription regulation, Zinc, Zinc-finger</b>                                                                                                                                                                                                                                                                            |
